# Supplementary material for: Multifunctional ternary semitransparent organic solar cell module with area above 100 cm2 and average visible transmittance above 30%
Source: Royal Society of Chemistry journal article supplement (doi:10.1039/d4ee03430a), 2024-01-01
Supplement: d4ee03430a1.pdf [file d4ee03430a1.pdf]

## **Multifunctional Ternary Semitransparent Organic Solar Cell Module with area above 100 cm<sup>2</sup> and Average Visible Transmittance above 30%**

Juxuan Xie,<sup>a</sup> Ju Zhao,<sup>a</sup> Zhisheng Zhou,<sup>a</sup> Kai Zhang,<sup>\*a</sup> Jiangkai Yu,<sup>a</sup> Chang Zhu,<sup>a</sup> and Fei Huang<sup>\*a</sup>

<sup>a</sup> Institute of Polymer Optoelectronic Materials and Devices, State Key Laboratory of Luminescent Materials and Devices, South China University of Technology, Guangdong Basic Research Center of Excellence for Energy & Information Polymer Materials, Guangzhou 510640, P. R. ChinaE-mail: Correspondence should be addressed to e-mail: mszhangk@scut.edu.cn; msfhuang@scut.edu.cn

## **Experimental Section**

### **1. Materials**

Glass/ITO substrates with 100 cm<sup>2</sup> modules were purchased from Advanced Election Technology Co., Ltd, while those with 21 cm<sup>2</sup> modules were obtained from South China Science & Technology Company Limited. PTzBI-Cl, DT-Y6, and PNDIT-F3N were purchased from Dongguan VOLT-AMP Optoelectronic Technology Co., Ltd. BTR-Cl was purchased from Solarmer Materials Inc. The PEDOT:PSS (CLEVIOS P VP A14083) was purchased from Heraeus Clevios. All materials and solvents were commercially available.

### **2. Small-area Devices Fabrication**

The Opaque OSCs were fabricated according to the device structure of ITO/PEDOT:PSS/BHJ/PNDIT-F3N/Ag (100 nm). Firstly, the patterned ITO substrates were subsequently cleaned with deionized water and isopropanol for 30 min, then dried in a vacuum oven at 60 °C for 12 h. Secondly, PEDOT:PSS was spin-coated onto the plasma-treated ITO substrates at 3500 rpm for 30 s and annealed at 150 °C for 15 min. The active layer solution was prepared by using the PTzBI-Cl:DT-Y6 or the PTzBI-Cl:BTR-Cl:DT-Y6 solute and toluene solvents at a concentration of 10 mg/mL. The active layer solution was spin-coated on PEDOT:PSS films, followed by annealing at 100 °C for 10 min. Then, the PNDIT-F3N solution was spin-coated at 2000 rpm for 30 s onto the active layer. Finally, the 100 nm Ag layer was evaporated in a high vacuum chamber of  $3 \times 10^{-6}$  Pa. The Semitransparent OSCs were fabricated according to the device structure of ITO/PEDOT:PSS/BHJ/PNDIT-F3N/Ag (10 nm, 15 nm, 20 nm, and 30 nm)/MoO<sub>3</sub>.

### **3. Large-area modules fabrication**

The 21 cm<sup>2</sup> module consists of seven interconnected sub-cells, while the 100 cm<sup>2</sup> module consists of thirteen interconnected sub-cells. For Opaque modules, active layer solution (PTzBI:BTR-Cl:DT-Y6=1:0.2:1.2, in toluene) deposited on PEDOT:PSS films by blade-coating with a coating velocity of 6 mm/s and gap height of 200 μm,

followed by annealing at 90 °C for 10 min in N<sub>2</sub> protected glove box. The semi-transparent module was fabricated using the same device process to the opaque module. Finally, the 100 nm Ag layer (15 nm Ag for semitransparent modules) was evaporated in a high vacuum chamber of 3×10<sup>-6</sup> Pa.

#### 4. Characterization

Keithley 2400 was used to measure the current density (J)-voltage (V) characteristics of small-area devices. The photovoltaic parameters of small-area devices were obtained under 1sun AM1.5G spectra by using a class solar simulator test system (Enlitech Technology Company). The light intensity (100 mW cm<sup>-2</sup>) was calibrated by China General Certification Center (CGC) certified reference monocrystal silicon cell (Enlitech). The photovoltaic parameters of small-area devices were obtained under 1sun AM1.5G spectra by using an Enli Solar simulator, and the beam size is 12 cm×12 cm. QE-R test system (Enlitech) was used to measure the EQE data. UV-vis absorption spectra and transmittance were measured by the ultraviolet-visible spectrophotometer (SHIMADZU UV-3600). Before each test, the light intensity (100 mW cm<sup>-2</sup>) was calibrated as a reference monocrystal silicon cell (Enlitech). The surface morphologies of the OSCs films were characterized using an atomic force microscope (NanoMan) and a transmission electron microscope (JET-2100F). Grazing incidence wide-angle X-ray scattering (GIWAXS) measurements were conducted using a Xeuss 2.0.

SCLC Measurements: Electron and hole mobility were calculated from the space-charge-limited current (SCLC) method. The hole-only device structures were ITO/PEDOT:PSS/BHJ/MoO<sub>3</sub>/Ag. The electron-only device structures were ITO/ZnO/BHJ/PNDIT-F3N/Ag. The mobility was calculated by fitting the dark current to the model of a single-carrier SCLC, which is described by the equation:  $J = (9/8)\epsilon_0\epsilon_r\mu((V_2)/(d_3))$ . Where J is current density,  $\mu$  is the zero-field mobility,  $\epsilon_0$  is the permittivity of the free space,  $\epsilon_r$  is the relative permittivity of the material, d is the thickness of the active layers, and V is the effective voltage.

Optical simulation: Under the premises that the layers are homogeneous, and their optical response can be

characterized by a complex refractive index ( $N=n+k \times i$ ), the transfer matrix method (TMM) was utilized to forecast the reflection and transmission at each interface, as well as the interference throughout the entire device. Optical simulation of the Glass/ITO/PEDOT:PSS/BHJ/PNDIT-F3N/Ag stack was performed to investigate the normalized optical electric field intensity  $|E|^2$ . Five steps were involved in conducting the optical simulation using MATLAB. Firstly, the refractive index ( $\eta$ ) and extinction coefficient ( $k$ ) were measured using an ellipsometer (ME-L ellipsometer, Wuhan Eoptics Technology Co., Wuhan, China). Secondly, Set up the optical function:  $Y_1, Y_2, \dots, Y_j, \dots, Y_n = F(\tilde{n}_1, \tilde{n}_2, \dots, \tilde{n}_j, \dots, \tilde{n}_m, d_1, d_2, \dots, d_j, \dots, d_m)$ , where  $Y_1$  is the  $i$ th characteristic of the device,  $\tilde{n}_j = \eta_j + i \times \kappa_j$  is the complex refractive index of the  $j$ th film, and  $d_j$  is the thickness of the  $j$ th film. Finally, the photoelectric field  $|E|^2$  in the devices should be calculated using TMM.

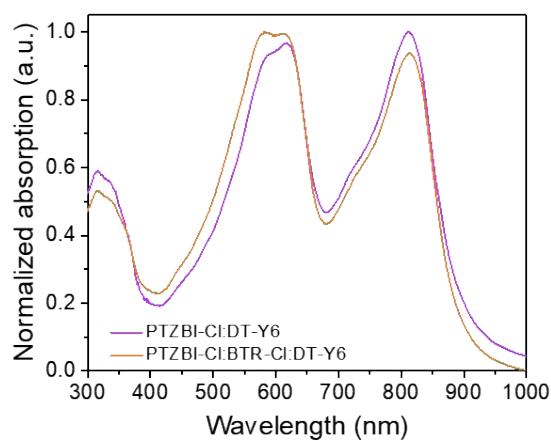

**Figure S1.** The absorption of PTzBI-Cl:DT-Y6 and PTzBI-Cl:BTR-Cl:DT-Y6 films.

| Ratio | $V_{oc}$ (V) | $J_{sc}$ (mA cm <sup>-2</sup> ) | FF (%)   | PCE <sub>avg</sub> (%) | PCE <sub>max</sub> (%) | AVT <sub>pure</sub> (%) <sup>a)</sup> |
|-------|--------------|---------------------------------|----------|------------------------|------------------------|---------------------------------------|
| 0     | 0.860±0.002  | 25.2±0.2                        | 74.6±0.4 | 16.2±0.0               | 16.2                   | 50.9                                  |
| 5%    | 0.850±0.001  | 25.5±0.1                        | 76.7±0.3 | 16.6±0.0               | 16.6                   | 50.5                                  |
| 10%   | 0.851±0.003  | 25.9±0.1                        | 77.2±0.3 | 17.0±0.0               | 17.0                   | 49.8                                  |
| 15%   | 0.853±0.004  | 24.4±0.1                        | 77.5±0.7 | 16.1±0.1               | 16.2                   | 46.1                                  |

**Table S1.** Photovoltaic parameters of devices at different BTR-Cl weight ratios.

a) The average transmittance of the pure active layer films in the visible light region.

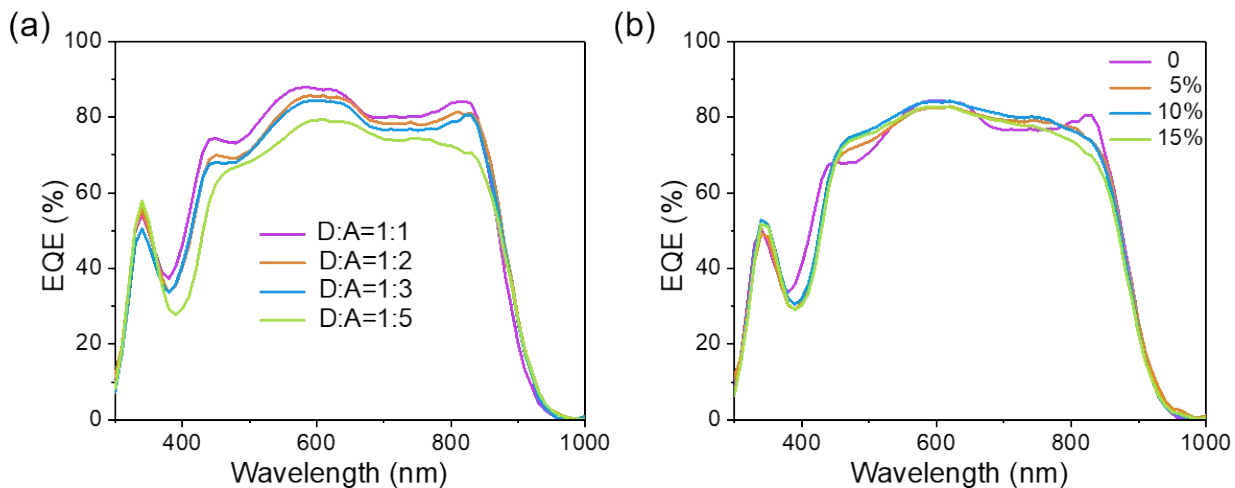

**Figure S2.** (a) EQE spectra of different D/A weight ratios. (b) EQE spectra of different BTR-Cl ratios.

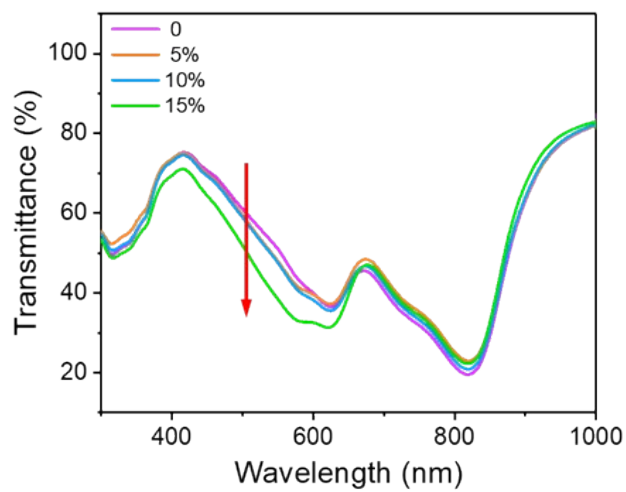

**Figure S3.** Transmittance spectra of films with different BTR-Cl ratios.

**Table**

|          | $V_0$ (V) | $J_{ph}$ (mA/cm <sup>2</sup> ) | $J_{sat}$ (mA/cm <sup>2</sup> ) | $G_{max}$ (m <sup>-3</sup> /s) | P(E,T) (%) | L(nm) |
|----------|-----------|--------------------------------|---------------------------------|--------------------------------|------------|-------|
| w/o      | 0.85      | 25.08                          | 25.56                           | $1.59 \times 10^{27}$          | 98.12      | 110   |
| w BTR-Cl | 0.86      | 26.16                          | 26.59                           | $1.62 \times 10^{27}$          | 98.38      | 110   |

**S2.**

The

relevan

t parameters of the  $J_{ph}$ - $V_{eff}$  curves.

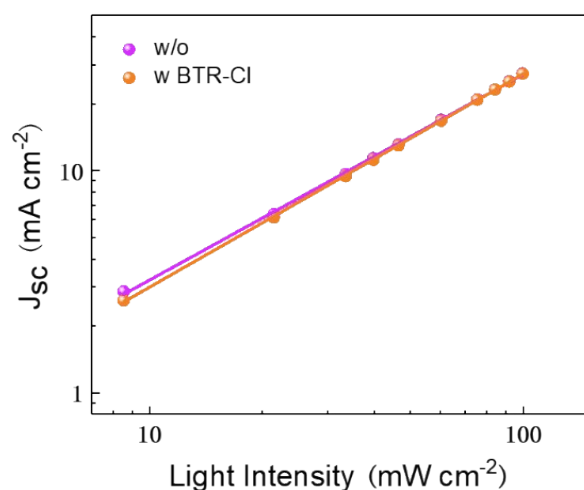

**Figure S4.** Light intensity dependence of  $J_{sc}$  of devices with and without BTR-Cl additive.

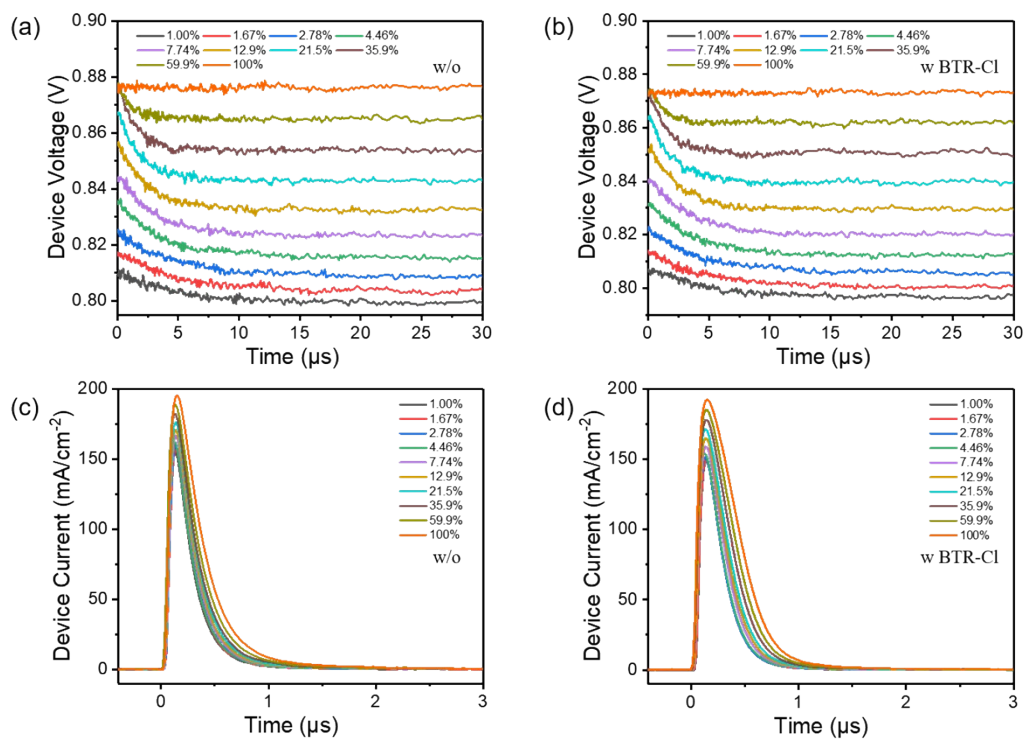

**Figure S5.** Transient photovoltage and charge extraction measurements. Transient photovoltage (a,b) and charge extraction (c,d) traces under different illumination intensities.



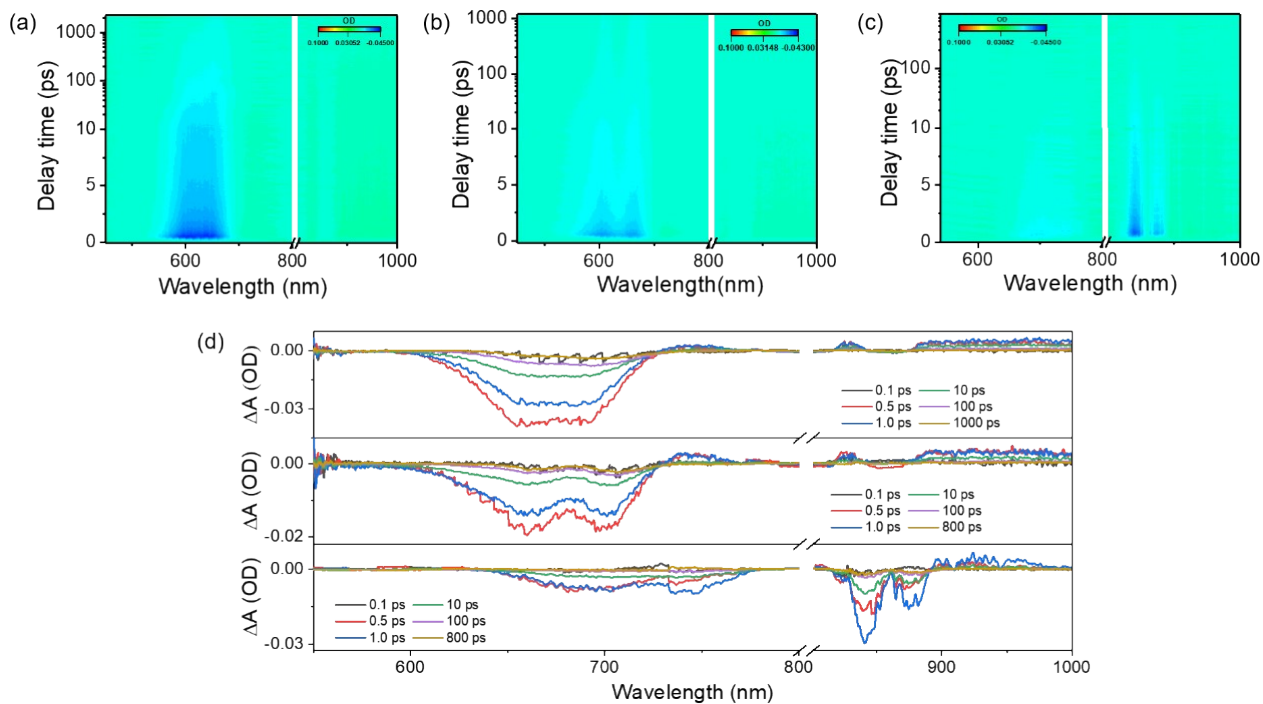

**Figure S6.** 2D color plots of TA spectra of a) PTzBI-Cl, b) BTR-Cl and c) DT-Y6 neat films. d) TA spectra of PTzBI-Cl, BTR-Cl, and DT-Y6 neat films.

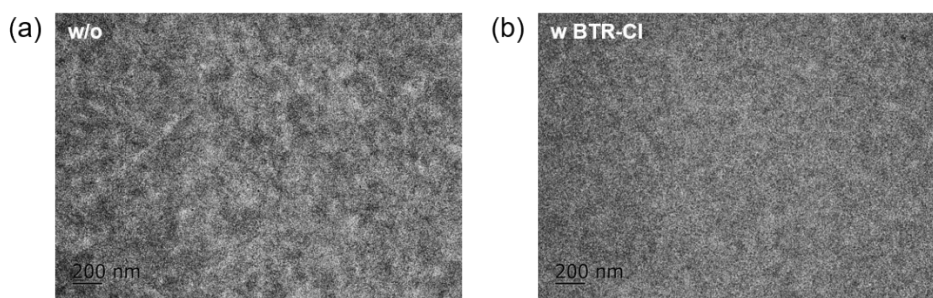

**Figure S7.** TEM image of (a) PTzBI-Cl:DT-Y6 blend film, (b) PTzBI-Cl:BTR-Cl:DT-Y6 blend film.

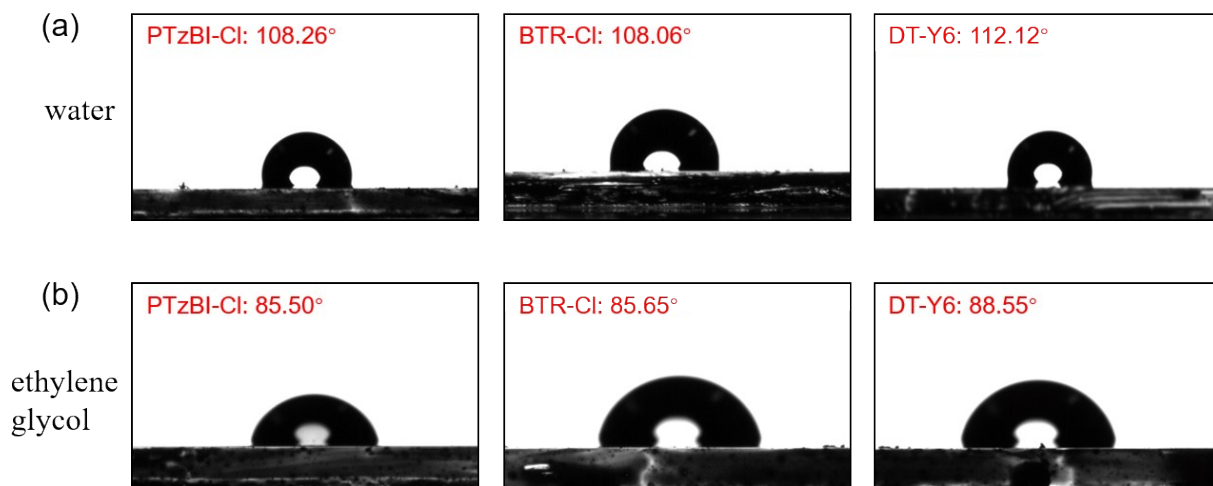

**Figure S8.** Contact angles of (a) water and (b) ethylene glycol on neat PTzBI-Cl, BTR-Cl, and DT-Y6 films.

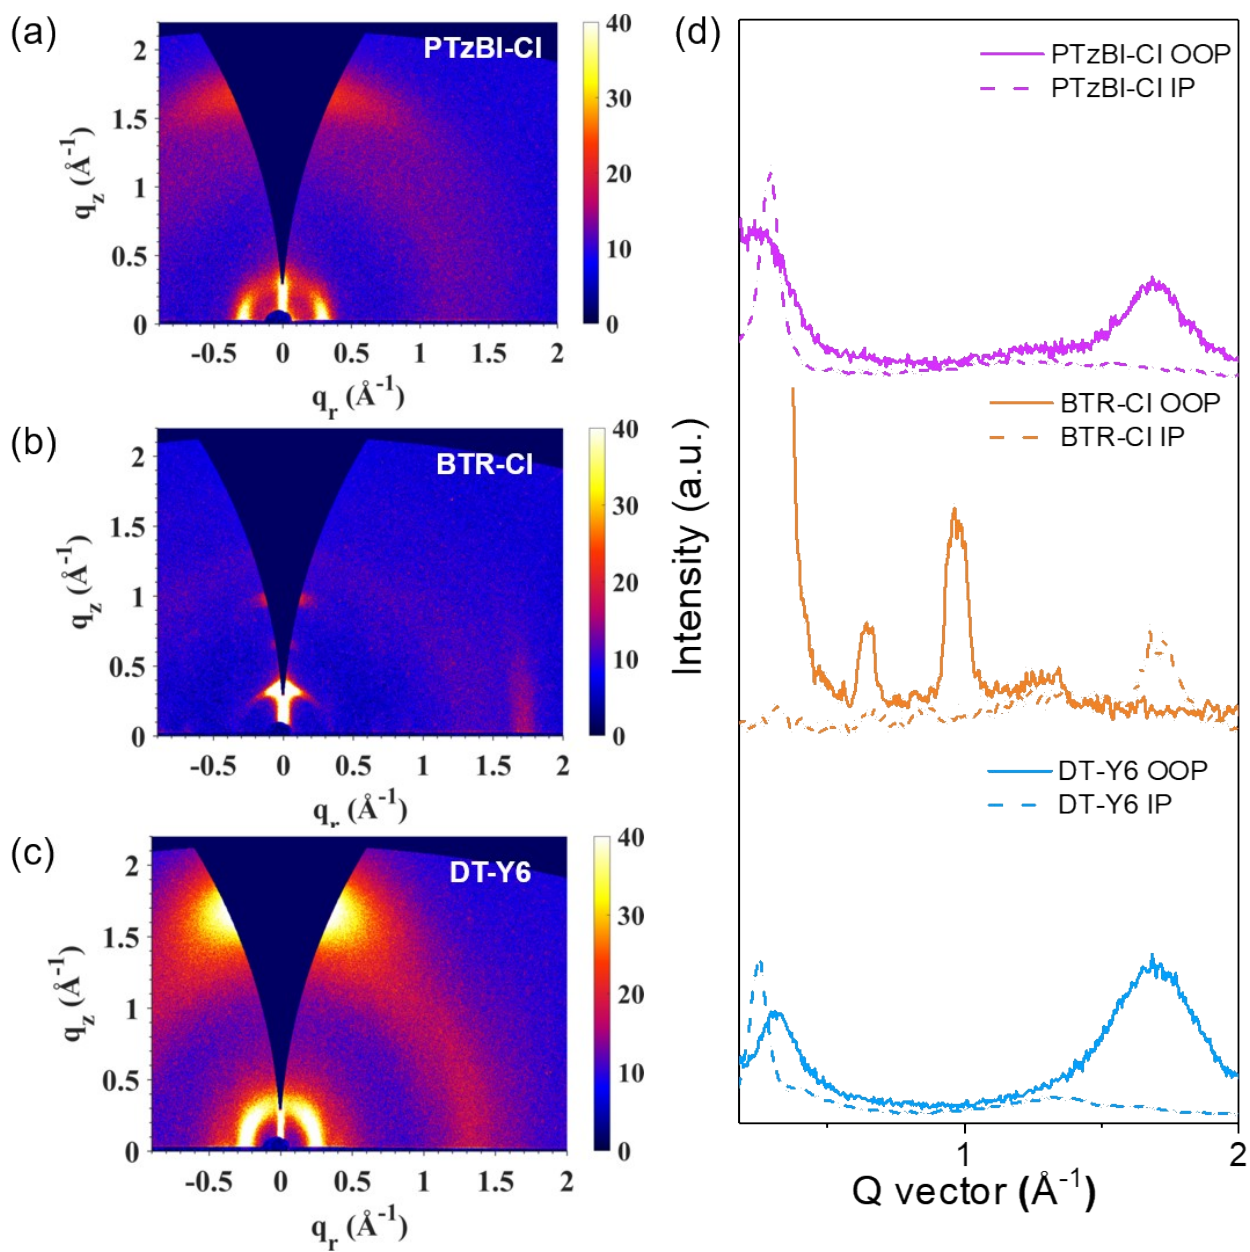

**Figure S9** 2D GIWAXS pattern of (a) PTzBI-Cl neat film, (b) BTR-Cl neat film, and (c) DT-Y6 neat film. (d) 1D profiles of out-of-plane direction and in-plane direction of PTzBI-Cl, BTR-Cl, and DT-Y6 neat films.

**Table S3** Molecular packing parameters of corresponding films.

| Sample                | Peak         | Peak location ( $\text{\AA}^{-1}$ ) | $\pi$ - $\pi$ stacking distance ( $\text{\AA}$ ) | FWHM ( $\text{\AA}^{-1}$ ) | Crystal coherence length ( $\text{\AA}$ ) |
|-----------------------|--------------|-------------------------------------|--------------------------------------------------|----------------------------|-------------------------------------------|
| PTzBI-Cl              | (100) In IP  | 0.280                               | /                                                | 0.070                      | 80.02                                     |
|                       | (010) In OOP | 1.693                               | 3.727                                            | 0.182                      | 30.95                                     |
| BTR-Cl                | (010) In IP  | 1.720                               | 3.665                                            | 0.153                      | 36.91                                     |
| DT-Y6                 | (100) In IP  | 0.251                               | /                                                | 0.060                      | 90.00                                     |
|                       | (010) In OOP | 1.703                               | 3.719                                            | 0.335                      | 16.85                                     |
| PTzBI-Cl: DT-Y6       | (100) In IP  | 0.285                               | /                                                | 0.075                      | 74.52                                     |
|                       | (010) In OOP | 1.721                               | 3.710                                            | 0.306                      | 18.46                                     |
| PTzBI-Cl:BTR-Cl:DT-Y6 | (100) In IP  | 0.290                               | /                                                | 0.079                      | 70.84                                     |
|                       | (010) In OOP | 1.729                               | 3.690                                            | 0.280                      | 20.15                                     |

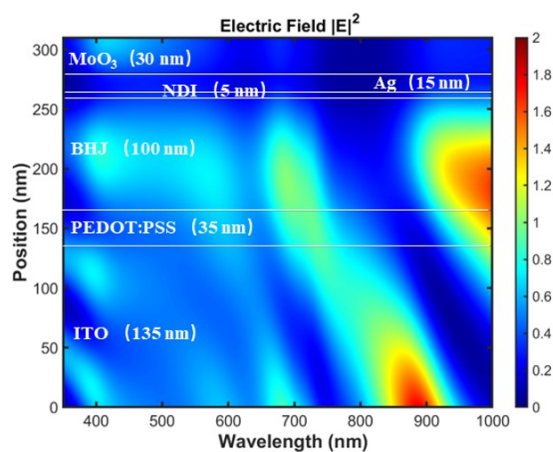**Figure 10.** Simulated electric field intensity  $|E|^2$  of ST-OSC with  $\text{MoO}_3$ .

**Table S4.** Photovoltaic performance parameters and optical parameters of different Ag thicknesses.

| Thickness (nm) | $V_{oc}$ (V) | $J_{sc}$ (mA cm <sup>-2</sup> ) | FF (%)   | PCE <sub>avg</sub> (%) | PCE <sub>max</sub> (%) | AVT (%) | LUE (%) | CRI | CIE             |
|----------------|--------------|---------------------------------|----------|------------------------|------------------------|---------|---------|-----|-----------------|
| 10             | 0.848±0.001  | 19.8±0.1                        | 72.6±0.9 | 12.2±0.1               | 12.3                   | 29.3    | 3.5     | 87  | (0.2606,0.2790) |
| 15             | 0.851±0.002  | 21.1±0.2                        | 74.3±0.8 | 13.3±0.2               | 13.5                   | 28.5    | 3.8     | 84  | (0.2553,0.2808) |
| 20             | 0.851±0.001  | 22.0±0.1                        | 76.1±0.5 | 14.3±0.0               | 14.3                   | 25.1    | 3.5     | 79  | (0.2252,0.2394) |
| 30             | 0.852±0.003  | 24.5±0.2                        | 76.7±0.6 | 15.8±0.1               | 15.9                   | 15.1    | 2.4     | 73  | (0.2116,0.2024) |

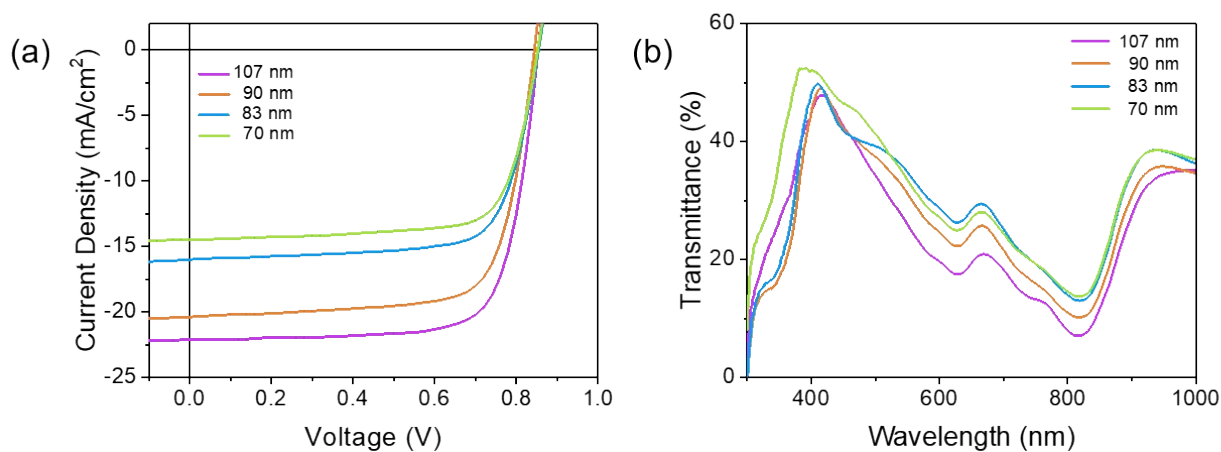**Figure S11.** (a) J-V curves of BHJ with different film thicknesses, (b) The transmittance spectra of BHJ with different film thicknesses.

**Table S5.** Photovoltaic performance parameters and optical parameters of different film thicknesses.

| Thickness (nm) | $V_{oc}$ (V) | $J_{sc}$ (mA cm <sup>-2</sup> ) | FF (%)   | PCE <sub>avg</sub> (%) | PCE <sub>max</sub> (%) | AVT (%) | LUE (%) | CRI | CIE             |
|----------------|--------------|---------------------------------|----------|------------------------|------------------------|---------|---------|-----|-----------------|
| 107            | 0.851±0.002  | 21.1±0.3                        | 74.3±0.8 | 13.3±0.2               | 13.5                   | 28.5    | 3.8     | 84  | (0.2553,0.2808) |
| 90             | 0.851±0.002  | 19.5±0.1                        | 75.0±0.2 | 12.5±0.1               | 12.6                   | 31.4    | 3.9     | 82  | (0.2704,0.3093) |
| 83             | 0.851±0.003  | 15.6±0.4                        | 73.9±0.9 | 9.8±0.1                | 9.9                    | 34.1    | 3.4     | 83  | (0.2708,0.3093) |
| 70             | 0.849±0.003  | 14.5±0.0                        | 73.6±0.3 | 9.1±0.0                | 9.1                    | 35.0    | 3.2     | 84  | (0.2823,0.3227) |

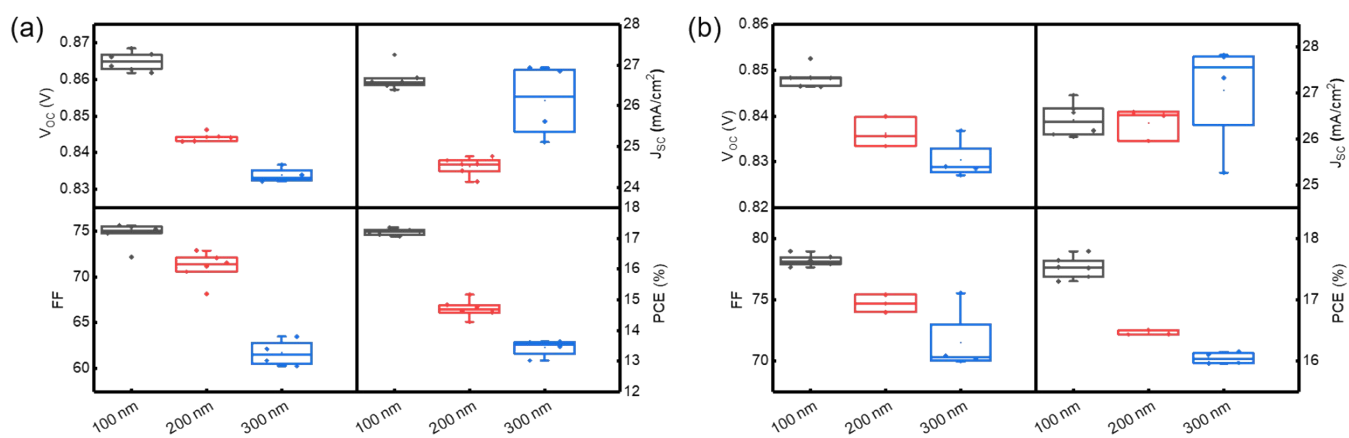**Figure S12.** Photovoltaic performance box diagrams of (a) PTzBI-Cl:DT-Y6 and (b) PTzBI-Cl:BTR-Cl:DT-Y6 at thicknesses of 100, 200 and 300 nm, respectively.

**Table S6.** Photovoltaic parameters of PTzBI-Cl:DT-Y6 and PTzBI-Cl:BTR-Cl:DT-Y6 at thicknesses of 100, 200 and 300 nm, respectively.

|                           | Thickness (nm) | $V_{oc}$ (V) | $J_{sc}$ (mA cm <sup>-2</sup> ) | FF (%)   | PCE <sub>avg</sub> (%) | PCE <sub>max</sub> (%) |
|---------------------------|----------------|--------------|---------------------------------|----------|------------------------|------------------------|
| PTzBI-Cl:DT-Y6            | 100            | 0.865±0.003  | 26.6±0.3                        | 74.7±1.2 | 17.2±0.1               | 17.3                   |
|                           | 200            | 0.844±0.001  | 24.5±0.2                        | 71.1±1.6 | 14.7±0.3               | 15.0                   |
|                           | 300            | 0.834±0.002  | 26.1±0.9                        | 61.7±1.4 | 13.4±0.2               | 13.6                   |
| PTzBI-Cl:BTR-<br>Cl:DT-Y6 | 100            | 0.848±0.002  | 26.4±0.3                        | 78.2±0.4 | 17.5±0.2               | 17.7                   |
|                           | 200            | 0.836±0.003  | 26.4±0.3                        | 74.6±0.7 | 16.5±0.0               | 16.5                   |
|                           | 300            | 0.830±0.004  | 27.0±1.2                        | 71.5±2.6 | 16.0±0.1               | 16.1                   |

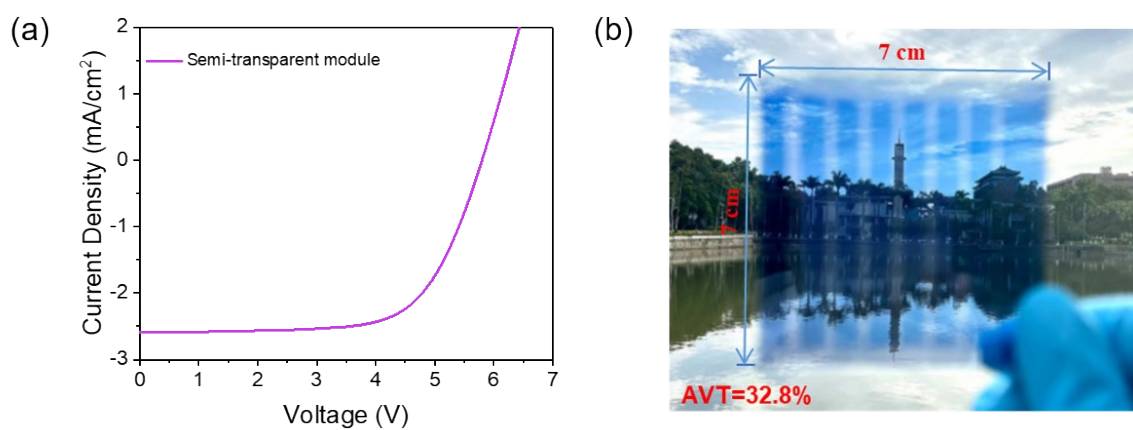

**Figure S13.** (a)  $J$ - $V$  curve of semi-transparent module based on PTzBI-Cl:BTR-Cl:DTY6. (b) The photograph of a semitransparent module for demonstration.

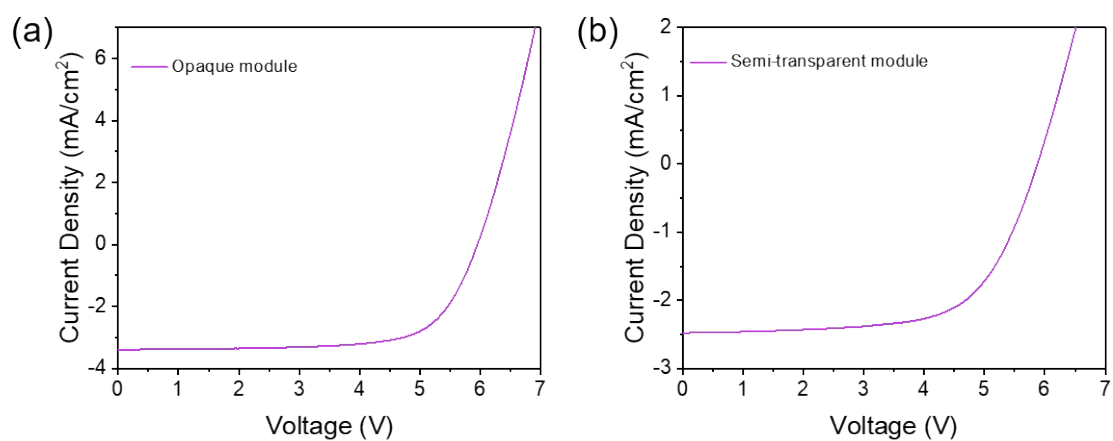

**Figure S14.** (a)  $J$ - $V$  curve of Opaque module based on PTzBI-Cl:DTY6. (b)  $J$ - $V$  curve of semi-transparent module based on PTzBI-Cl:DTY6.



**Table S7.** Photovoltaic performances of large-area modules (21 cm<sup>2</sup>) based on PTzBI-Cl:DTY6 under illumination of AM 1.5G, 100 mW cm<sup>-2</sup>.

| Device Type | $V_{oc}$ (V) | $J_{sc}$ (mA cm <sup>-2</sup> ) | FF (%)   | PCE <sub>avg</sub> (%) | PCE <sub>max</sub> (%) | AV T (%) | LUE (%) | IRR (%) | CRI  | CIE           |
|-------------|--------------|---------------------------------|----------|------------------------|------------------------|----------|---------|---------|------|---------------|
| Opaque      | 5.8±0.1      | 3.3±0.1                         | 70.2±0.3 | 14.0±0.1               | 14.1                   |          |         |         |      |               |
| ST          | 5.8±0.1      | 2.4±0.1                         | 64.7±0.3 | 9.4±0.0                | 9.4                    | 32.8     | 3.0     | 75.2    | 83.9 | (0.267,0.297) |

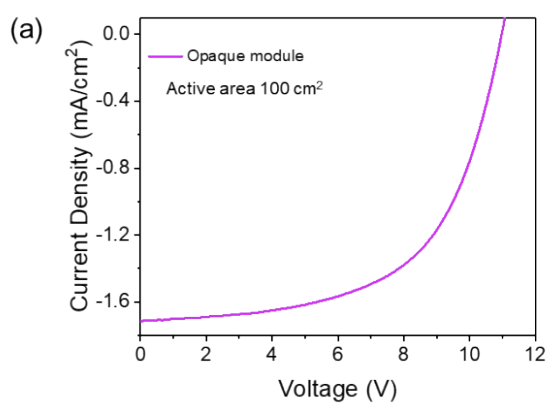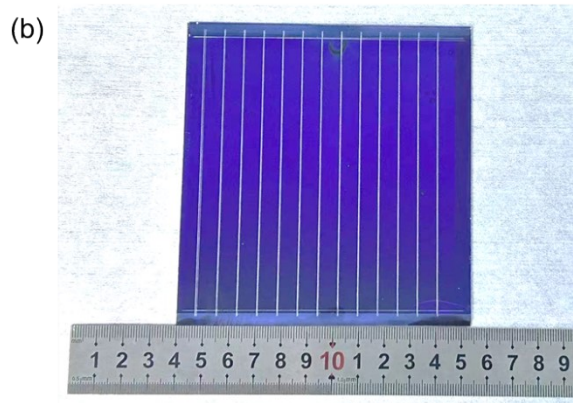

**Figure S15.** (a)  $J$ - $V$  curve of opaque module (active area 100 cm<sup>2</sup>) based on PTzBI-Cl:BTR-Cl:DTY6, (b) The photograph of an opaque OSC module.

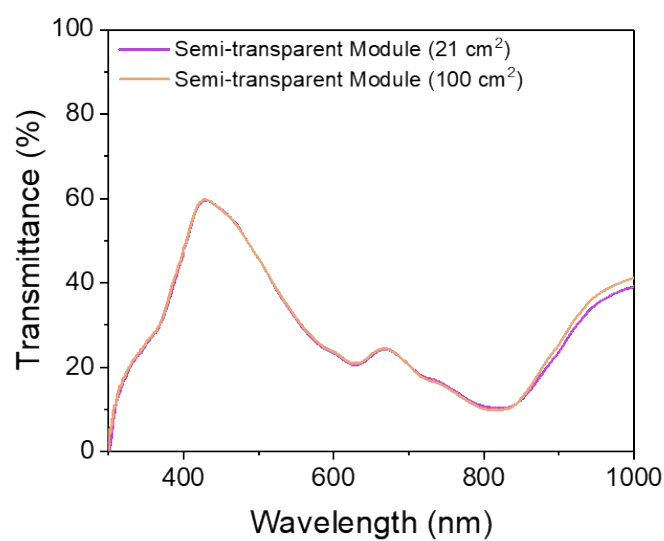

**Figure S16.** The transmittance spectra of the semitransparent module.

**Table S8.** The summary of PCEs obtained from recently reported large-area organic photovoltaic devices with active areas over 10 cm<sup>2</sup>.

| Active layer                                      | Coating method   | Active area (cm <sup>2</sup> ) | PCE (%)            | Ref. |
|---------------------------------------------------|------------------|--------------------------------|--------------------|------|
| PM6:Y6:PC <sub>61</sub> BM                        | blade coating    | 26.2                           | 12.6               | [1]  |
| PBDB-T:ITIC                                       | slot-die coating | 15                             | 8.9                | [1]  |
| PTB7-Th:COi <sub>8</sub> DFIC:PC <sub>71</sub> BM | slot-die coating | 25                             | 10.1 <sup>a)</sup> | [1]  |
| PTB7-Th:COi <sub>8</sub> DFIC:PC <sub>71</sub> BM | slot-die coating | 50                             | 9.05 <sup>a)</sup> | [1]  |
| PM6:Y6:PC <sub>71</sub> BM                        | spin coating     | 10.1                           | 12.6               | [1]  |
| PM6:Y6:PC <sub>71</sub> BM                        | spin coating     | 54                             | 13.2               | [1]  |
| PM6:DTY6                                          | blade coating    | 18                             | 14.4 <sup>a)</sup> | [1]  |
| SMD2:ITIC-Th                                      | slot-die coating | 80                             | 5.25               | [1]  |
| P3HT: <i>o</i> -IDTBR                             | blade coating    | 59.5                           | 4.7                | [1]  |
| TPD-3F:IT-4F                                      | blade coating    | 20.4                           | 10.4 <sup>a)</sup> | [2]  |
| PM6:Y6                                            | blade coating    | 36                             | 7.31               | [2]  |
| PM6:Y6:BTO:PC71BM                                 | blade coating    | 36                             | 14.26              | [2]  |

|                                    |                         |        |                     |      |
|------------------------------------|-------------------------|--------|---------------------|------|
| PNTz4T-5MTC:PCBM                   | bar coating             | 54.45  | 6.61 <sup>a)</sup>  | [2]  |
| PTB7-Th:T2-OEHRH                   | bar coating             | 55.5   | 9.32 <sup>a)</sup>  | [2]  |
| PBDB-T:CNDTBTC8IDT-                | bar coating             | 54.45  | 9.21                | [2]  |
| PBDB-TF:IT-4F                      | blade coating           | 58.5   | 9.03                | [2]  |
| PBDB-T-2F:N3:P(NDI2OD-T2)          | blade coating           | 20.61  | 14.31               | [2]  |
| PBDB-T-2F:N3:P(NDI2OD-T2)          | blade coating           | 58.5   | 14.04               | [2]  |
| PM6/Y6                             | blade coating           | 36     | 13.47               | [3]  |
| PB2:FTCC-Br:BTP-eC9                | blade coating           | 10     | 15.9                | [4]  |
| PB2:FTCC-Br:BTP-eC9                | blade coating           | 15     | 15.3                | [4]  |
| PB2:FTCC-Br:BTP-eC9                | blade coating           | 20     | 14.5                | [4]  |
| PB2:FTCC-Br:BTP-eC9                | blade coating           | 50     | 15.2                | [4]  |
| PBQx-TF:eC9-2Cl                    | blade coating           | 20     | 15.1 <sup>a)</sup>  | [5]  |
| PM6:Qx-1                           | slot-die coating        | 15     | 12.3 <sup>a)</sup>  | [6]  |
| PM6:CH7                            | blade coating           | 25.2   | 14.42 <sup>a)</sup> | [7]  |
| PM6:Y7-BO:PC71BM:BTA-Erh           | D-bar coating           | 55     | 12.2                | [8]  |
| PM6: BO-4Cl:m-BTP-PhC6             | spin coating            | 19.3   | 16.04               | [9]  |
| PM6:BTP-eC9                        | meniscus-guided coating | 25     | 11.29 <sup>a)</sup> | [10] |
| PM6:BTP-BO-4Cl                     | blade coating           | 18.73  | 14.79 <sup>a)</sup> | [11] |
| PM6:BTP-eC9:L8-BO: BTP-S10         | blade coating           | 67.915 | 12.2                | [12] |
| PM6:Y6:ITIC:PC71BM                 | spin coating            | 19.34  | 13.25               | [13] |
| TPD-3:Y6                           | spin coating            | 20.4   | 9.31                | [14] |
| D18:DTC11                          | blade coating           | 21     | 15.4 <sup>a)</sup>  | [15] |
| PM6:BTP-eC9/IO-4Cl                 | spin coating            | 15.48  | 13.24               | [16] |
| PM6:L8-BO                          | blade coating           | 18.73  | 15.2 <sup>a)</sup>  | [17] |
| PM6-PBDBT(55):IPC1CN-BBO-<br>IC2Cl | blade coating           | 58.5   | 11.28 <sup>a)</sup> | [18] |
| PBDB-T-2F:L8-BO                    | blade coating           | 10.8   | 9.54                | [19] |
| PM6:L8-BO:PJ1                      | slot-die coating        | 30     | 13.08 <sup>a)</sup> | [20] |
| PM6:P2:L8-BO                       | bar coating             | 55     | 13.88 <sup>a)</sup> | [21] |

|                        |                  |       |                     |           |
|------------------------|------------------|-------|---------------------|-----------|
| PM6:PBQx-TCl:PY-IT     | spin coating     | 19.3  | 16.26 <sup>a)</sup> | [22]      |
| PTVT-T:GS60            | blade coating    | 22    | 11.2 <sup>a)</sup>  | [23]      |
| PTQ10:BTP-4F-12:PC71BM | blade coating    | 10.17 | 10.77 <sup>a)</sup> | [24]      |
| PM6:Y6-C12:PC61BM      | blade coating    | 204   | 15.0 <sup>a)</sup>  | [25]      |
| PBQx-TF:eC9-2Cl        | slot-die coating | 21.9  | 15.8 <sup>a)</sup>  | [26]      |
| D18:L8-BO              | spin coating     | 19.8  | 15.44               | [27]      |
| D18:L8-BO:PY-TPT       | blade coating    | 16.6  | 13.84 <sup>a)</sup> | [28]      |
| PM6:L8-BO:BTO-BO       | spin coating     | 15.03 | 16.35 <sup>a)</sup> | [29]      |
| PM6:D18:L8-BO          | blade coating    | 15.6  | 16.03 <sup>a)</sup> | [30]      |
| PM6:D18:L8-BO          | blade coating    | 72    | 14.45 <sup>a)</sup> | [30]      |
| PM6:BTP-ec9            | blade coating    | 28.82 | 16.04 <sup>a)</sup> | [31]      |
| PM6:BTP-ec9            | blade coating    | 16.94 | 14.58 <sup>a)</sup> | [32]      |
| PM6:BO-4Cl             | spin coating     | 19.31 | 15.74 <sup>a)</sup> | [33]      |
| D18-N-m-10:L8-BO       | slot-die coating | 43    | 12.43               | [34]      |
| PTzBI-Cl:BTR-Cl:DT-Y6  | blade coating    | 21    | 15.2 <sup>a)</sup>  | This work |
| PTzBI-Cl:BTR-Cl:DT-Y6  | blade coating    | 100   | 11.04               | This work |

a) The related large-area devices were fabricated by non-halogen solvents.

**Table S9.** The summary of PCEs obtained from recently reported large-area semi-transparent organic photovoltaic devices with active areas over 10 cm<sup>2</sup>.

| Active layer              | Coating method   | Active area (cm <sup>2</sup> ) | PCE (%)      | AVT (%) | Ref. |
|---------------------------|------------------|--------------------------------|--------------|---------|------|
| P3HT:PCBM                 | spray coating    | 30                             | 1.8          | 30      | [35] |
| PBTZT-stat-BDTT-8:PV-A600 | slot-die coating | 114.5                          | 4.5          | 20      | [36] |
| PBDTTT-EFT:PC71BM         | blade coating    | 216                            | 4.5          | 10      | [37] |
| PBDTTT-EFT:PC71BM         | blade coating    | 216                            | 4.97         | 8.25    | [37] |
| P3HT:IDTBR                | blade coating    | 60                             | 5            | 6.2     | [38] |
| PBDB-T:ITIC:PC71BM        | blade coating    | 216                            | 7.7          | 8.25    | [39] |
| PM6:DTY6                  | blade coating    | 18                             | 11.6         | 10.8    | [40] |
| PM6:DTY6                  | blade coating    | 18                             | 9.8          | 14.5    | [40] |
| PM6:DTY6                  | blade coating    | 18                             | 7.1          | 18.7    | [40] |
| PTB7:PC70BM               | spin coating     | 18.63                          | 8.22         | 41.25   | [41] |
| PCE-10:BT-CIC:TT-FIC      | spin coating     | 12.8                           | 7.5          | 3.2     | [42] |
| PM6:Y6-hu                 | bar coating      | 36.22                          | 10.47 (red)  | -       | [43] |
| PM6:Y6-hu                 | bar coating      | 36.22                          | 10.01(greed) | -       | [43] |
| PM6:Y6-hu                 | bar coating      | 36.22                          | 10.39 (blue) | 10.05   | [43] |
| J52-Cl:BTA3:BTA1          | spin coating     | 12                             | 5.88         | 20.8    | [44] |
| PM6:BTP-BO-4Cl            | blade coating    | 18.73                          | 12.01        | 22.3    | [11] |
| PM6:BO-4Cl:m-BTP-PhC6     | spin coating     | 18.61                          | 11.28        | -       | [11] |
| PVX                       | slot-die coating | 22.5                           | 6.20         | 17.01   | [45] |
| PVX                       | slot-die coating | 45                             | 7.8          | 17.01   | [45] |
| PVX                       | slot-die coating | 60                             | 7.1          | 20.5    | [46] |
| PVX                       | slot-die coating | 60                             | 5.9          | 28.3    | [46] |
| PVX                       | slot-die coating | 60                             | 4.4          | 36.1    | [46] |
| PTQ10:BTP-4F-12:PC71BM    | blade coating    | 10.17                          | 9.75         | 11.3    | [24] |

|                       |               |     |       |       |           |
|-----------------------|---------------|-----|-------|-------|-----------|
| PTB7-Th:IEICO-4F      | blade coating | 56  | 3.5   | 56    | [47]      |
| PM6:Y6:PCBM           | -             | 54  | 8.17  | 36.67 | [48]      |
| PTzBI-Cl:BTR-Cl:DT-Y6 | blade coating | 21  | 10.22 | 32.8  | This work |
| PTzBI-Cl:BTR-Cl:DT-Y6 | blade coating | 100 | 6.71  | 32.9  | This work |

## References

1. P. Xue, P. Cheng, R. P. S. Han, X. Zhan, *Mater. Horiz.*, 2022, **9**, 194-219.
2. S. Rasool, J. Yeop, H. W. Cho, W. Lee, J. W. Kim, D. Yuk, J. Y. Kim, *Mater. Futures*, 2023, **2**, 032102.
3. J. Jing, Y. Dou, S. Chen, K. Zhang, F. Huang, *eScience*, 2023, **3**, 100142.
4. J. Wang, P. Bi, Y. Wang, Z. Zheng, Z. Chen, J. Qiao, W. Wang, J. Li, C. An, S. Zhang, X. Hao, J. Hou, *CCS Chem.*, 2023, **1**, 218-229.
5. J. Wang, Y. Wang, P. Bi, Z. Chen, J. Qiao, J. Li, W. Wang, Z. Zheng, S. Zhang, X. Hao, J. Hou, *Adv. Mater.*, 2023, **35**, 2301583.
6. Y. Shen, H. Zhang, J. Zhang, C. Tian, Y. Shi, D. Qiu, Z. Zhang, K. Lu, Z. Wei, *Adv. Mater.*, 2023, **35**, 2209030.
7. S. Zhang, H. Chen, P. Wang, S. Li, Z. Li, Y. Huang, J. Liu, Z. Yao, C. Li, X. Wan, Y. Chen, *Sol. RRL*, 2023, **7**, 2300029.
8. T. Gokulnath, J. Kim, H. Kim, J. Park, D. Song, H.-Y. Park, R. Kumaresan, Y. Y. Kim, J. Yoon, S.-H. Jin, *ACS Appl. Mater. Interfaces*, 2023, **15**, 19307-19318.
9. D. Wang, Y. Li, G. Zhou, E. Gu, R. Xia, B. Yan, J. Yao, H. Zhu, X. Lu, H.-L. Yip, H. Chen, C.-Z. Li, *Energy Environ. Sci.*, 2022, **15**, 2629-2637.
10. H. Li, S. Liu, X. Wu, Q. Qi, H. Zhang, X. Meng, X. Hu, L. Ye, Y. Chen, *Energy Environ. Sci.*, 2022, **15**, 2130-2138.
11. J. Fan, Z. Liu, J. Rao, K. Yan, Z. Chen, Y. Ran, B. Yan, J. Yao, G. Lu, H. Zhu, C. Li, H. Chen, *Adv. Mater.*, 2022, **34**, 2110569.
12. L. Zhan, S. Yin, Y. Li, S. Li, T. Chen, R. Sun, J. Min, G. Zhou, H. Zhu, Y. Chen, J. Fang, C. Ma, X. Xia, X. Lu, H. Qiu, W. Fu, H. Chen, *Adv. Mater.*, 2022, **34**, 2206269.
13. Z. Jia, Z. Chen, X. Chen, J. Yao, B. Yan, R. Sheng, H. Zhu, Y. (Michael) Yang, *Photon. Res.*, 2021, **9**, 324-330.
14. J. Wu, C. Liao, Y. Chen, R. M. Jacobberger, W. Huang, D. Zheng, K. Tsai, W. Li, Z. Lu, Y. Huang, M. R. Wasielewski, Y. Chang, T. J. Marks, A. Facchetti, *Adv. Energy Mater.*, 2021, **11**, 2102648.
15. Z. Zhong, S. Chen, J. Zhao, J. Xie, K. Zhang, T. Jia, C. Zhu, J. Jing, Y. Liang, L. Hong, S. Zhu, D. Ma, F. Huang, *Adv. Energy Mater.*, 2023, **13**, 2302273.
16. Y. Liu, C. Xie, X. Dong, Y. Wang, W. Wei, K. Feng, S. Xiong, Y. Jiang, Y. Zhou, *Sol. RRL*, 2023, **7**, 2300642.

17. J. Xiang, Z.-X. Liu, H. Chen, C.-Z. Li. *Adv. Mater.*, 2023, **35**, 2303729.
18. P. Gopikrishna, J. Rhee, S. Yoon, D. Um, H. Jin, Y. Jun, H. Choi, H. J. Son, B. Kim, *Adv. Funct. Mater.*, 2023, **33**, 2305541.
19. W. Zha, L.-M. Chen, S. Sun, X. Gao, Y. Han, T. Liu, Q. Luo, Y.-C. Chao, H.-W. Zan, H.-F. Meng, X. Zhu, C.-Q. Ma, *Sol. RRL*, 2023, **7**, 2300322.
20. C. Tian, J. Zhang, Y. Shen, H. Zhang, Z. Zhang, D. Qiu, L. Zhang, Z. Wei, *Sol. RRL*, 2023, **7**, 2300349.
21. T. Gokulnath, H. Kim, J. Lee, B. H. Cho, H.-Y. Park, J. Jee, Y. Y. Kim, K. Kranthiraja, J. Yoon, S.-H. Jin, *Adv. Energy Mater.*, 2023, **13**, 2302538.
22. T. Chen, X. Zheng, D. Wang, Y. Zhu, Y. Ouyang, J. Xue, M. Wang, S. Wang, W. Ma, C. Zhang, Z. Ma, S. Li, L. Zuo, H. Chen, *Adv. Mater.*, 2023, **36**, 2308061,
23. J. Wang, Y. Wang, J. Li, Y. Yu, B. Bi, j. Qiao, Z. Chen, C. Wang, W. Wang, J. Dai, X. Hao, S. Zhang, J. Hou, *Angew. Chem. Int. Ed.* 2023, **62**, 202314362.
24. J. Wachsmuth, A. Distler, C. Liu, T. Heumüller, Y. Liu, C. M. Aitchison, A. Hauser, M. Rossier, A. Robitaille, M.-A. Llobel, P.-O. Morin, A. Thepaut, C. Arrive, I. McCulloch, Y. Zhou, C. J. Brabec, H.-J. Egelhaaf, *Sol. RRL*, 2023, **7**, 2300602.
25. R. Basu, F. Gumpert, J. Lohbreier, P.-O. Morin, V. Vohra, Y. Liu, Y. Zhou, C. J. Brabec, H.-J. Egelhaaf, A. Distler, *Joule*, 2024, **8**, 970-978.
26. Y. Yu, J. Wang, Y. Cui, Z. Chen, T. Zhang, Y. Xiao, W. Wang, J. Wang, X.-T. Hao, J. Hou, *J Am Chem Soc*, 2024, **146**, 8697-8705.
27. Y. Li, Z. Jia, P. Huang, T. Liu, D. Hu, Y. Li, H. Liu, X. Lu, S. Lu, X. Yin, Y. Yang, *Adv. Energy Mater.*, 2024, **14**, 2304000.
28. Y. Wei, X. Zhou, Y. Cai, Y. Li, S. Wang, Z. Fu, R. Sun, N. Yu, C. Li, K. Huang, Z. Bi, X. Zhang, Y. Zhou, X. Hao, J. Min, Z. Tang, W. Ma, Y. Sun, H. Huang, *Adv. Mater.*, 2024, <https://doi.org/10.1002/adma.202403294>, 2403294.
29. H. Chen, W. Sun, R. Zhang, Y. Huang, B. Zhang, G. Zeng, J. Ding, W. Chen, F. Gao, Y. Li, Y. Li, *Adv. Mater.*, 2024, <https://doi.org/10.1002/adma.202402350>, 2402350.
30. B. Zhang, W. Chen, H. Chen, G. Zeng, R. Zhang, H. Li, Y. Wang, X. Gu, W. Sun, H. Gu, F. Gao, Y. Li, Y. Li, *Energy Environ. Sci.*, 2024, **17**, 2935-2944.
31. Z. Liu, Y. Fu, J. Wu, X. Yi, M. Zhao, M. Huang, J. Liu, Z. Xie, *Adv. Funct. Mater.* 2024, <https://doi.org/10.1002/adfm.202401558>, 2401558.
32. H. Wang, S. Liu, H. Li, M. Li, X. Wu, S. Zhang, L. Ye, X. Hu, Y. Chen, *Adv. Mater.*, 2024, **36**, 2313098.
33. Z. Jia, J. Pan, X. Chen, Y. Li, T. Liu, H. Zhu, J. Yao, B. Yan, Y. Yang, *Energy Environ. Sci.*, 2024., **17**, 3908–3916
34. D. Qiu, C. Tian, H. Zhang, J. Zhang, Z. Wei, K. Lu, *Adv. Mater.*, 2024, <https://doi.org/10.1002/adma.202313251>, 2313251.
35. J. E. Lewis, E. Lafalce, P. Togliola, X. Jiang, *Sol. Energy Mater. Sol. Cells*, 2011, **95**, 2816-2822.
36. S. Berny, N. Blouin, A. Distler, H. J. Egelhaaf, M. Krompiec, A. Lohr, O. R. Lozman, G. E. Morse, L. Nanson, A. Pron, T. Sauermann, N. Seidler, S. Tierney, P. Tiwana, M. Wagner, H. Wilson, *Adv. Sci.*, 2016, **3**, 1500342.
37. P. T. Tsai, K. C. Lin, C. Y. Wu, C. H. Liao, M. C. Lin, Y. Q. Wong, H. F. Meng, C. Y. Chang, C. L. Wang, Y. F. Huang, S. F. Horng, H. W. Zan, Y. C. Chao, *ChemSusChem*, 2017, **10**, 2778-2787.
38. S. Strohm, F. Machui, S. Langner, P. Kubis, N. Gasparini, M. Salvador, I. McCulloch, H. J. Egelhaaf, C. J. Brabec, *Energy Environ. Sci.*, 2018, **11**, 2225-2234.
39. K.-M. Huang, C.-M. Lin, S.-H. Chen, C.-S. Li, C.-H. Hu, Y. Zhang, H.-F. Meng, C.-Y. Chang, Y.-C. Chao, H.-

- W. Zan, L. Huo, P. Yu, *Sol. RRL*, 2019, **3**, 1900071.
40. S. Dong, T. Jia, K. Zhang, J. Jing, F. Huang, *Joule*, 2020, **4**, 2004-2016.
  41. J. H. Jeong, M. Jahandar, A. Prasetio, J. M. Kim, J. H. Kim, S. Kim, D. C. Lim, *Chem. Eng. J.*, 2021, **419**, 129672.
  42. X. Huang, D. Fan, S. R. Forrest, *Org. Electron.*, 2021, **97**, 109276.
  43. S. Rasool, J. W. Kim, H. W. Cho, Y. J. Kim, D. C. Lee, C. B. Park, W. Lee, O. H. Kwon, S. Cho, J. Y. Kim, *Adv. Energy Mater.*, 2022, **13**, 2203452.
  44. Q. Wu, Y. Yu, X. Xia, Y. Gao, T. Wang, R. Sun, J. Guo, S. Wang, G. Xie, X. Lu, E. Zhou, J. Min, *Joule*, 2022, **6**, 2138-2151.
  45. C.-S. Tsao, C.-M. Chuang, H.-C. Cha, Y.-Y. Huang, Y.-M. Sung, T.-Y. Chung, Y.-T. Chang, Z.-C. Hu, T.-C. Liu, W.-Y. Ma, Y.-H. Wang, K.-P. Chang, Y.-C. Chao, H.-F. Meng, *Mater. Today Energy*, 2023, **36**, 101340.
  46. Y. M. Sung, C. S. Tsao, H. C. Cha, W. Y. Ma, *Prog Photovolt Res Appl.*, 2023, **31**, 803-812.
  47. A. Sharma, N. Gasparini, A. Markina, S. Karuthedath, J. Gorenflot, H. Xu, J. Han, A. Balawi, W. Liu, D. Bryant, J. Bertrandie, J. Troughton, S. H. K. Paleti, H. Bristow, F. Laquai, D. Andrienko, D. Baran, *Adv. Mater.*, 2024, **36**, 2305367.
  48. M. F. Albab, M. Jahandar, Y. H. Kim, Y.-K. Kim, M. Shin, A. Prasetio, S. Kim, D. C. Lim, *Nano Energy*, 2024, **121**, 109219.
